# Supplementary material for: In vivo versus in silico assessment of potentially pathogenic missense variants in human reproductive genes
Source: bioRxiv or medRxiv preprint supplement (doi:10.1101/2021.10.12.464112), 2023-01-23
Supplement: Supplementary file [file media-1.pdf]

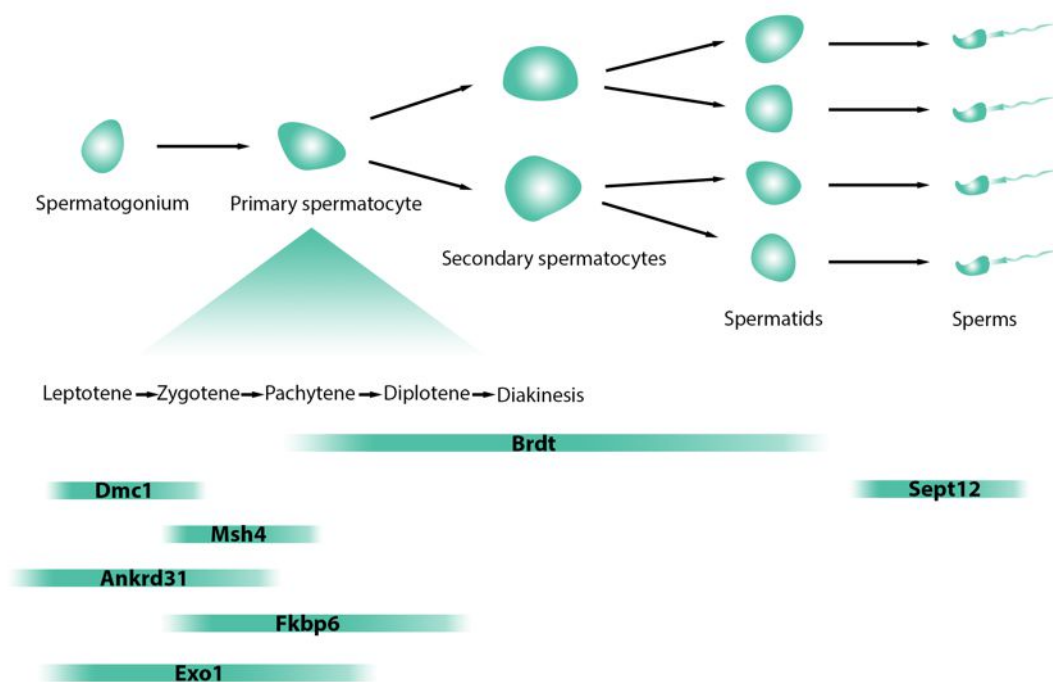

**Figure S1. Spermatogenesis schematic showing temporal involvement of seven studied genes.** The green horizontal bars represent the gametogenesis stage that is impacted in knockout mice.
