# Supplementary material for: In vivo versus in silico assessment of potentially pathogenic missense variants in human reproductive genes
Source: bioRxiv or medRxiv preprint supplement (doi:10.1101/2021.10.12.464112), 2023-01-23
Supplement: Supplementary file [file media-4.pdf]

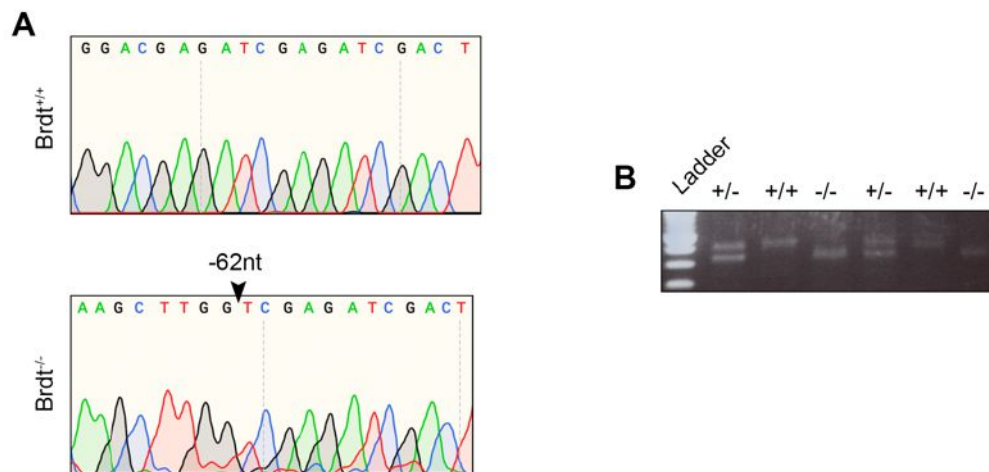

**Figure S4. Genotyping *Brdt*<sup>-/-</sup> mice.** A) Representative Sanger sequencing chromatograms from WT and mutant mice. Black arrowhead above the chromatogram indicates the breakpoint of the 62nt deletion. B) Representative PCR genotyping results of pups from a het X het mating.
