# Supplementary material for: In vivo versus in silico assessment of potentially pathogenic missense variants in human reproductive genes
Source: bioRxiv or medRxiv preprint supplement (doi:10.1101/2021.10.12.464112), 2023-01-23
Supplement: Supplementary file [file media-5.pdf]

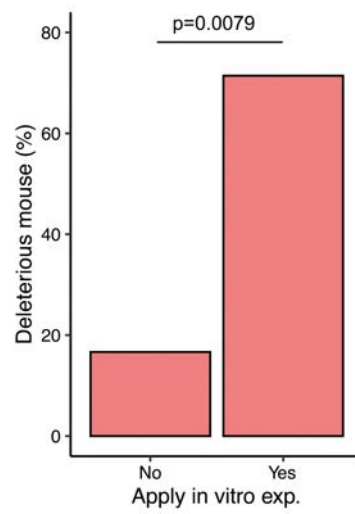

**Figure S5. *In vitro* pre-screen experiments can improve the selection of variants that yield phenotypes in mouse models.** The p value was calculated by two-sided Fisher's Exact Test.
